# Supplementary material for: Synergistic hydrazine-driven regulation and Mo/S co-doping to endow BiOBr with heterovalent molybdenum states and abundant oxygen vacancy defects for photocatalytic hydrogen evolution
Source: Royal Society of Chemistry journal article supplement (doi:10.1039/d4ta05641h), 2024-01-01
Supplement: d4ta05641h1.pdf [file d4ta05641h1.pdf]

## Supporting Information

### **Synergistic hydrazine-driven regulation and Mo/S co-doping to endow BiOBr with heterovalent molybdenum states and abundant oxygen vacancy defects for photocatalytic hydrogen evolution**

Zhengjie Su<sup>1</sup>, Binghong Wu<sup>1</sup>, Dong-Hau Kuo<sup>2,\*</sup>, Longyan Chen<sup>1</sup>, Pengkun Zhang<sup>1</sup>, Baoqian Yang<sup>1</sup>,  
Xinru Wu<sup>1</sup>, Dongfang Lu<sup>1,\*</sup>, Jinguo Lin<sup>1,\*</sup>, Xiaoyun Chen<sup>1,\*</sup>

<sup>1</sup> College of Materials Engineering, Fujian Agriculture and Forestry University, Fuzhou 350002, China

<sup>2</sup> Department of Materials Science and Engineering, National Taiwan University of Science and Technology, Taipei  
10607, Taiwan

\*Corresponding author

*E-mail address:* [dhkuo@mail.ntust.edu.tw](mailto:dhkuo@mail.ntust.edu.tw) (D. H. Kuo)

*E-mail address:* [fjldf@126.com](mailto:fjldf@126.com) (D. Lu)

*E-mail address:* [fjlinjg@126.com](mailto:fjlinjg@126.com) (J. Lin)

*E-mail address:* [fjchenxy@126.com](mailto:fjchenxy@126.com) (X. Chen)

## Experimental Section

### 1. Apparent quantum efficiency computation

According to the literature reports [1-2] for measuring the apparent quantum efficiency (AQE). The experiment was measured under the photocatalytic reaction conditions of monochromatic light of 420 nm ( $\lambda$ ), average radiation intensity (I) of 3.23 mW/cm<sup>-2</sup>, and irradiation area (A) of 31.9 cm<sup>2</sup>. The total H<sub>2</sub> evolution with 50 mg of Mo/S-BiOBr-3 catalyst was 543.8  $\mu$ mol, which can be used to determine the reacted photons ( $N_{\text{reac}}$ ). The number of photons ( $N_{\text{in}}$ ) illuminated to the reactor is computed according to the following equations:

$$N_{\text{in}} = \frac{E \times \lambda}{h \times c} = \frac{A \times I \times t \times \lambda}{h \times c} = \frac{31.9 \times 3.23 \times 10^{-3} \times 3600 \times 6 \times 420 \times 10^{-9}}{6.626 \times 10^{-34} \times 3 \times 10^8} = 4.72 \times 10^{21}$$

$$\text{AQE} = \frac{N_{\text{reac}}}{N_{\text{in}}} \times 100\% = \frac{2 \times 6.02 \times 10^{23} \times 543.8 \times 10^{-6}}{4.72 \times 10^{21}} \times 100\% = 13.9\%$$

### Additional figures and tables

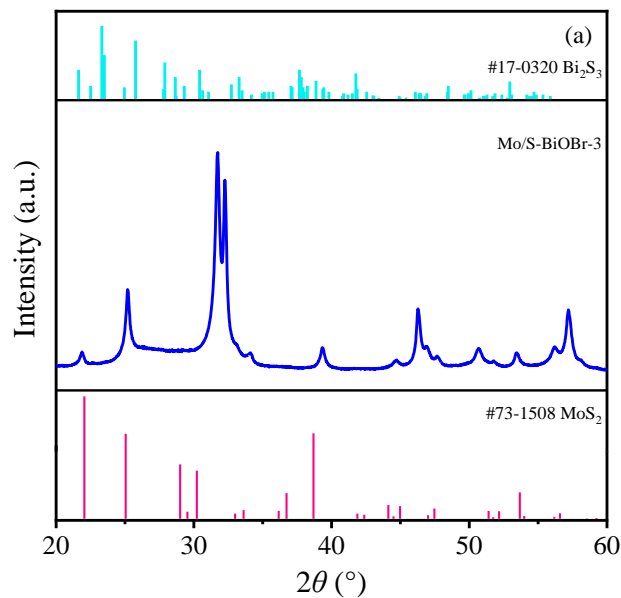

Fig. S1 XRD pattern of Mo/S-BiOBr-3 with the Bi<sub>2</sub>S<sub>3</sub> (PDF #17-0320) and MoS<sub>2</sub> (PDF #73-1508) standard cards.

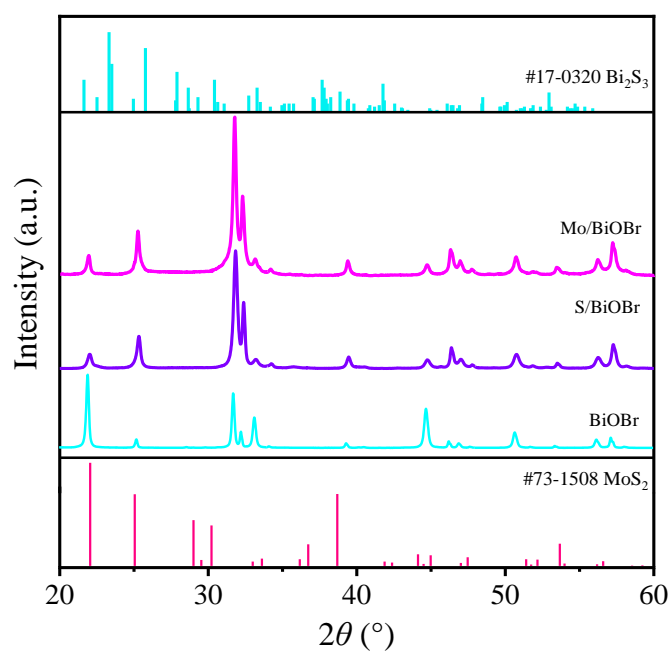

Fig. S2 XRD patterns of BiOBr, Mo/BiOBr, and S/BiOBr with the Bi<sub>2</sub>S<sub>3</sub> (PDF #17-0320) and MoS<sub>2</sub> (PDF #73-1508) standard cards.

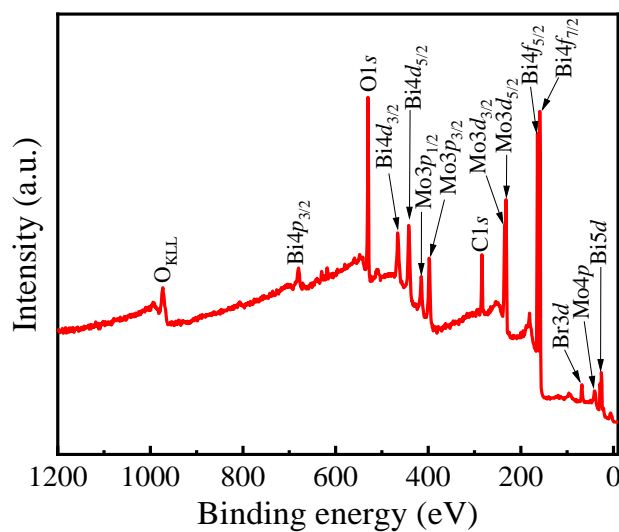

Fig. S3 The survey XPS spectrum of Mo/S-BiOBr-3.

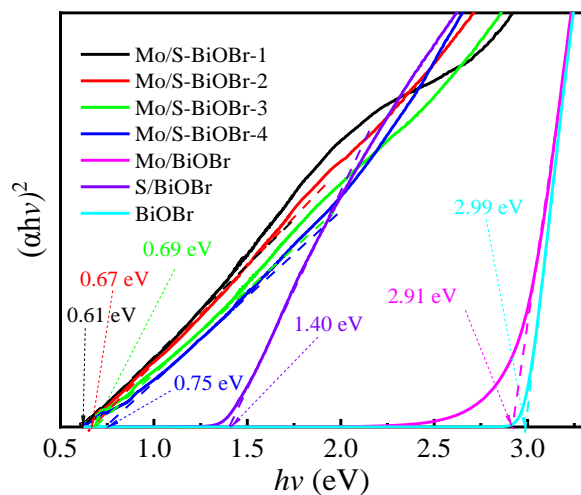

Fig. S4 The direct bandgap  $(\alpha hv)^2 - hv$  curves of Mo/S-BiOBr, Mo/BiOBr, S/BiOBr, and BiOBr catalysts.

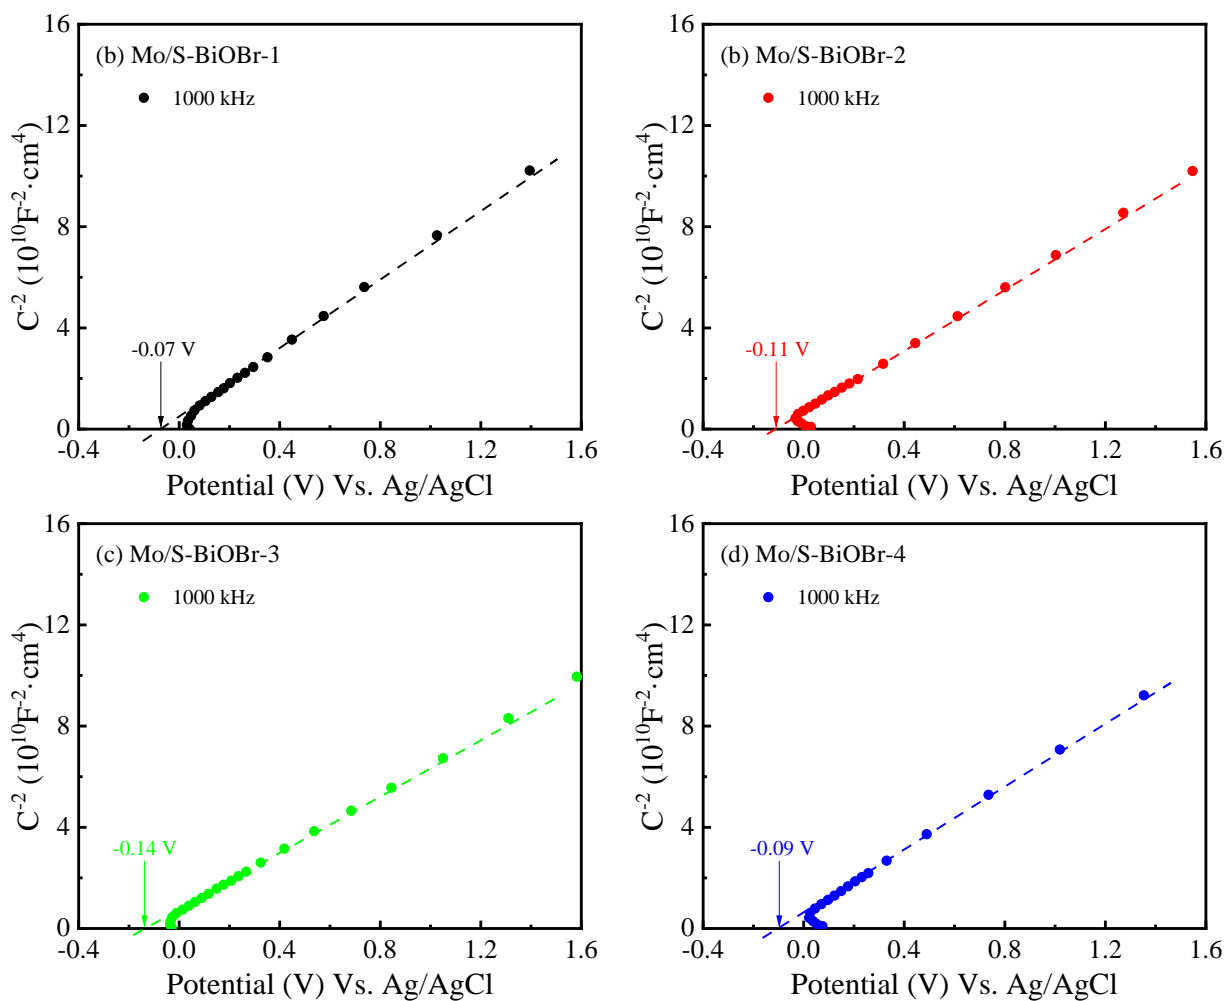

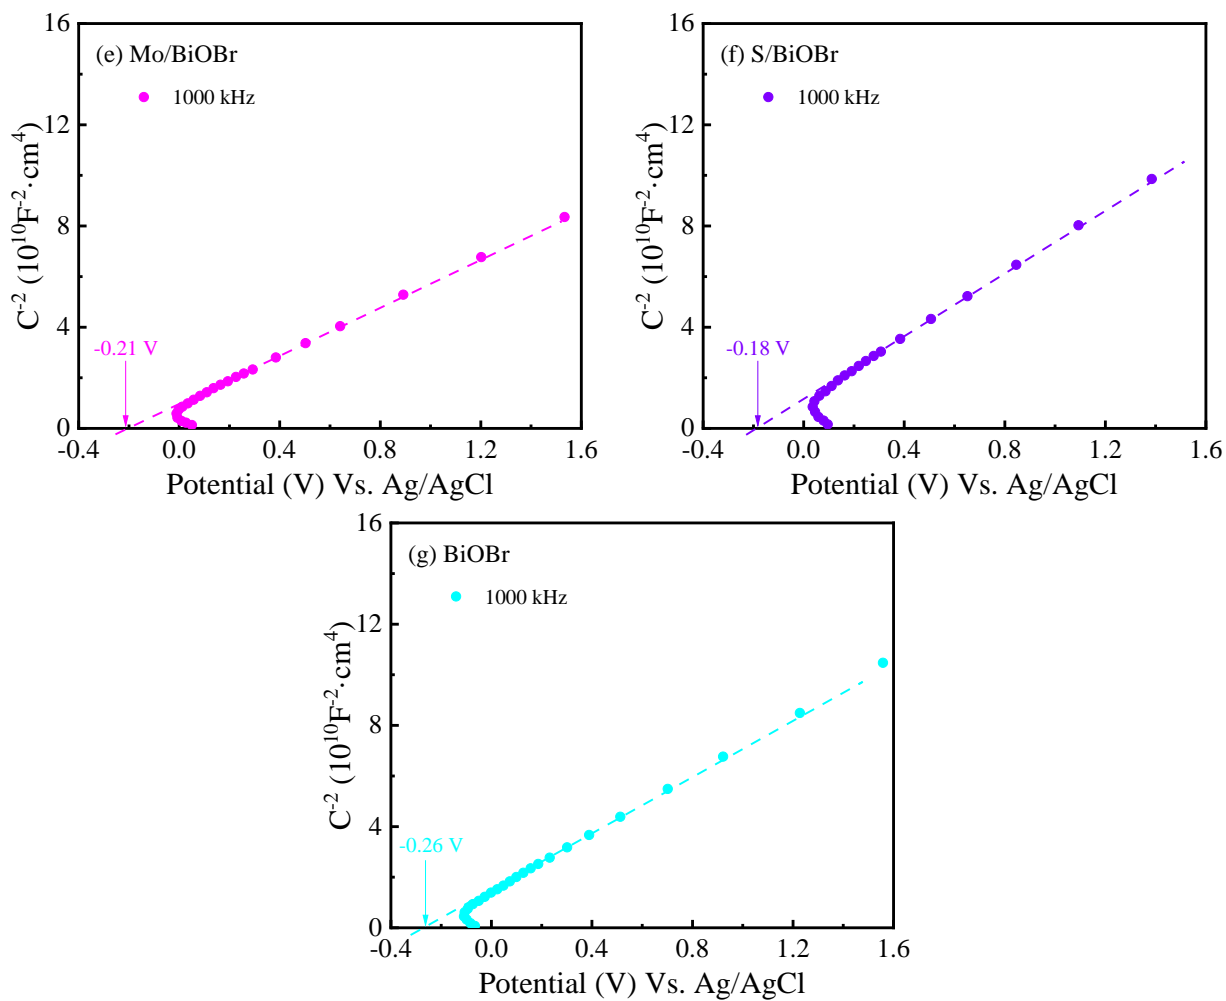

Fig. S5 Mott-Schottky curves of Mo/S-BiOBr, Mo/BiOBr, and S/BiOBr at 1000 kHz.

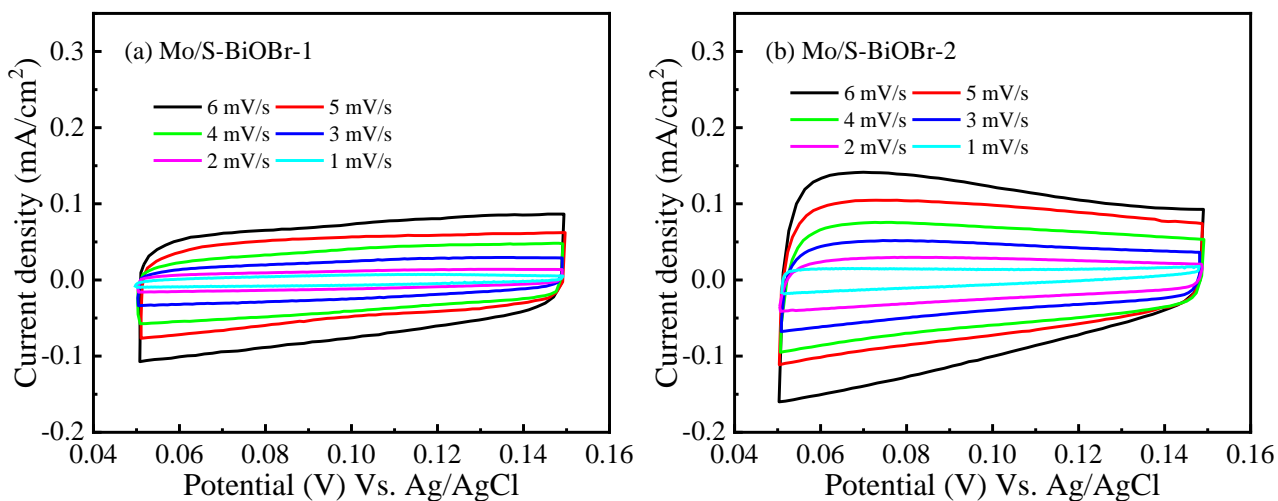

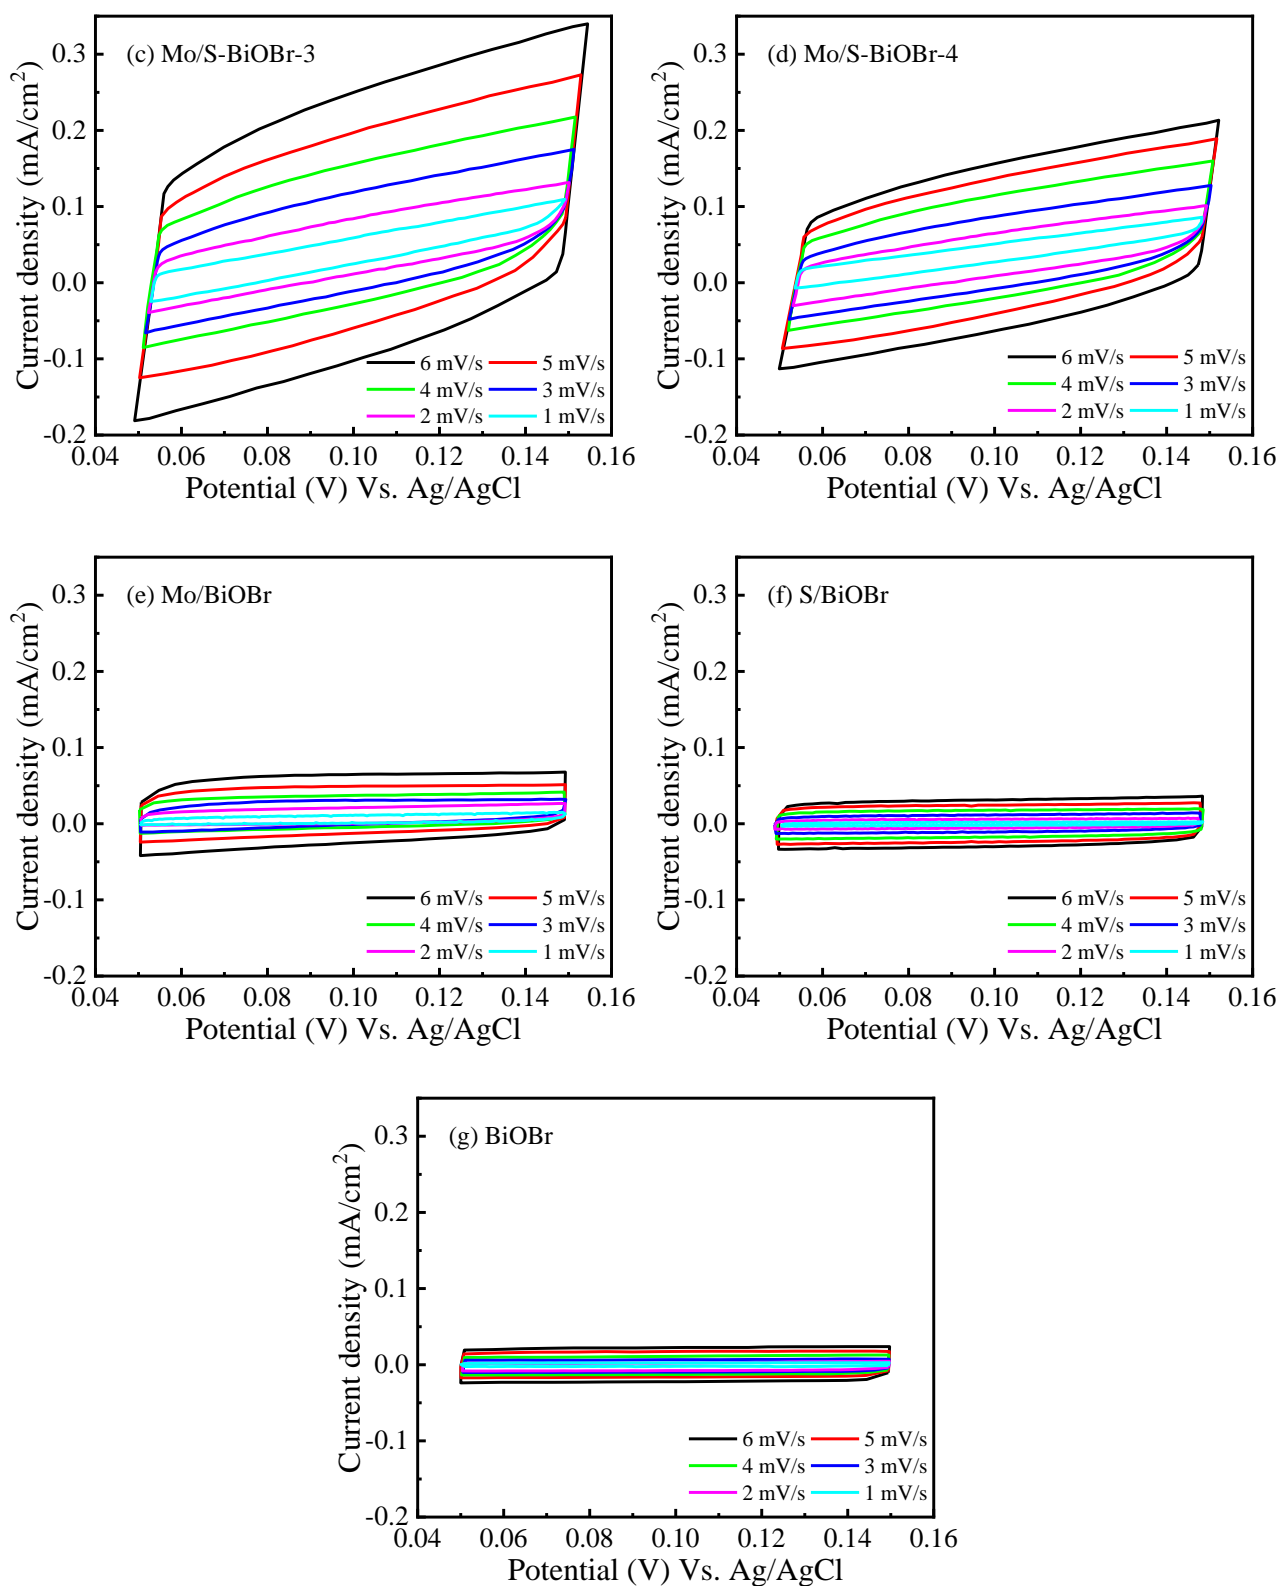

Fig. S6 Current density-potential plots of (a) Mo/S-BiOBr-1, (b) Mo/S-BiOBr-2, (c) Mo/S-BiOBr-3, (d) Mo/S-BiOBr-4, (e) Mo/BiOBr, (f) S/BiOBr, and (g) BiOCl.

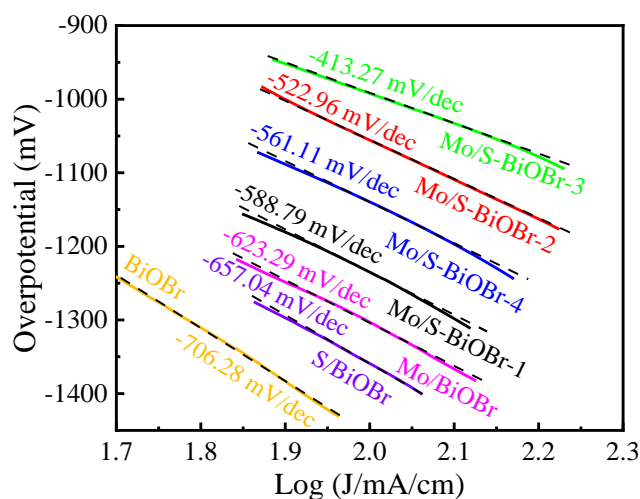

Fig. S7 Tafel-slope plots of Mo/S-BiOBr, Mo/BiOBr, S/BiOBr, and BiOBr electrocatalysts.

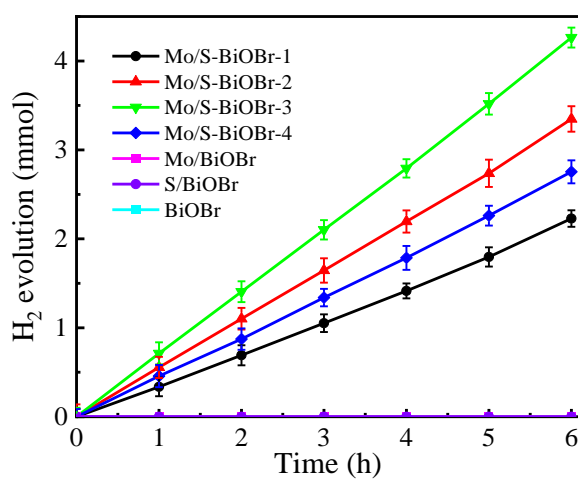

Fig. S8 Photocatalytic hydrogen evolution of BiOBr-based catalysts varied with the duration time.

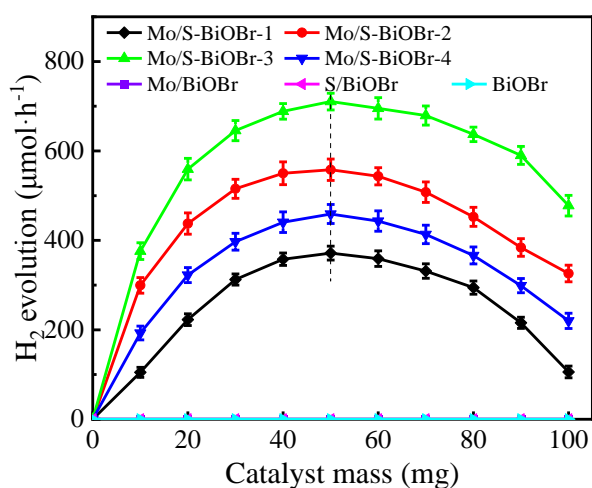

Fig. S9 Variation of PHER rate with the amount of Mo/S-BiOBr, Mo/BiOBr, S/BiOBr, and BiOBr catalysts.

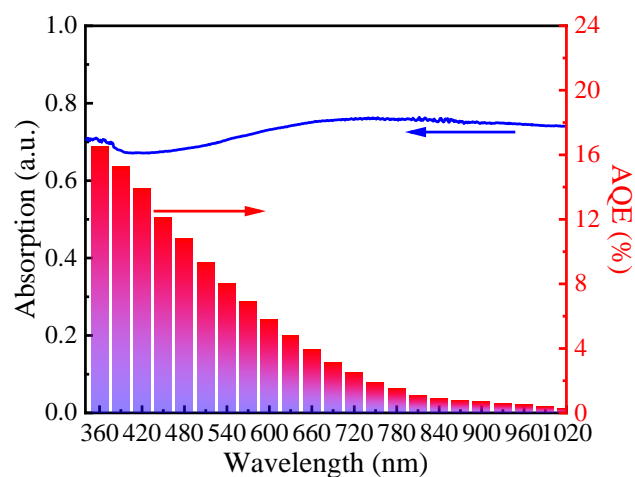

Fig. S10 Dependence of AQE Mo/S-BiOBr-3 as a function of irradiation wavelength, combining the UV-vis absorption spectrum.

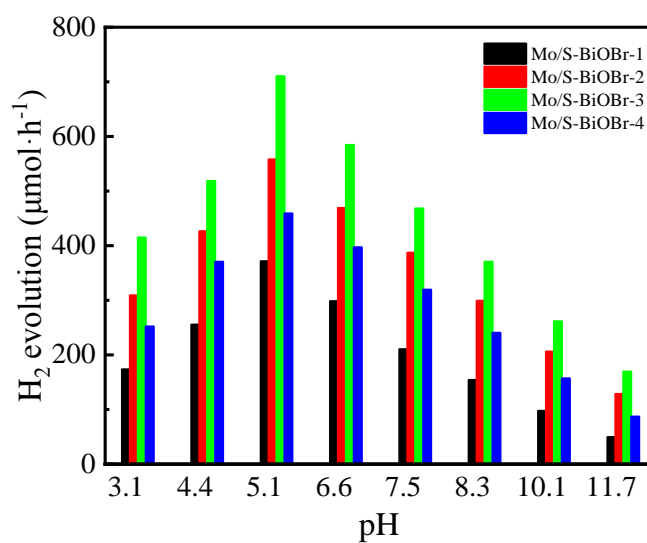

Fig. S11 PHER of Mo/S-BiOBr at different pH values.



**Table S1** XPS composition,  $V_O$  (%), crystal size, and  $S_{BET}$  analyses of Mo/S-BiOBr and BiOBr catalysts

| Catalyst                       | Atomic percentage/% |      |       |      |       | Mo <sup>4+</sup> /<br>Mo <sup>4+</sup> +Mo <sup>6+</sup><br>(%) | $V_O$<br>(%) | Crystallinity<br>(%) | Crystal<br>size<br>(nm) | $S_{BET}$<br>(m <sup>2</sup> ·g <sup>-1</sup> ) | Pore<br>volume<br>(cm <sup>3</sup> ·g <sup>-1</sup> ) |
|--------------------------------|---------------------|------|-------|------|-------|-----------------------------------------------------------------|--------------|----------------------|-------------------------|-------------------------------------------------|-------------------------------------------------------|
|                                | Bi                  | Mo   | Br    | S    | O     |                                                                 |              |                      |                         |                                                 |                                                       |
| Mo/S-BiOBr-1                   | 27.83               | 6.47 | 23.31 | 8.21 | 34.18 | 29.73                                                           | 7.11         | 90.48                | 45.7                    | 14.1                                            | 0.148                                                 |
| Mo/S-BiOBr-2                   | 28.09               | 6.51 | 22.96 | 8.11 | 34.33 | 32.64                                                           | 12.75        | 89.97                | 30.0                    | 15.5                                            | 0.161                                                 |
| Mo/S-BiOBr-3                   | 27.76               | 6.39 | 23.17 | 8.15 | 34.53 | 37.40                                                           | 18.50        | 90.52                | 18.2                    | 16.3                                            | 0.186                                                 |
| Mo/S-BiOBr-4                   | 27.98               | 6.42 | 23.13 | 8.19 | 34.28 | 41.58                                                           | 9.96         | 89.83                | 15.4                    | 14.8                                            | 0.159                                                 |
| BiOBr                          | 32.77               | N/A  | 30.40 | N/A  | 36.83 | N/A                                                             | N/A          | 94.99                | 63.8                    | 0.1                                             | 0.017                                                 |
| Mo/S-BiOBr-3<br>after reaction | 27.68               | 6.45 | 22.99 | 8.09 | 34.79 | 37.26                                                           | 18.44        | 89.94                | 19.1                    | 15.9                                            | 0.181                                                 |

**Table S2** Element contents from SEM-EDS analysis for Mo/S-BiOBr and BiOBr catalysts

| Catalyst     | Bi    | Mo   | Br    | S    | O     |
|--------------|-------|------|-------|------|-------|
| Mo/S-BiOBr-1 | 27.63 | 6.39 | 23.27 | 8.39 | 34.32 |
| Mo/S-BiOBr-2 | 27.97 | 6.43 | 23.06 | 8.14 | 34.40 |
| Mo/S-BiOBr-3 | 27.84 | 6.47 | 22.98 | 8.11 | 34.60 |
| Mo/S-BiOBr-4 | 28.07 | 6.33 | 23.07 | 8.14 | 34.39 |
| BiOBr        | 32.84 | N/A  | 30.43 | N/A  | 36.73 |

**Table S3** XRF chemical element compositions of Mo/S-BiOBr and BiOBr catalysts

| Catalyst     | Bi    | Mo   | Br    | S    | O     |
|--------------|-------|------|-------|------|-------|
| Mo/S-BiOBr-1 | 27.73 | 6.43 | 23.34 | 8.27 | 34.23 |
| Mo/S-BiOBr-2 | 28.11 | 6.33 | 23.03 | 8.19 | 34.34 |
| Mo/S-BiOBr-3 | 27.81 | 6.41 | 23.12 | 8.08 | 34.58 |
| Mo/S-BiOBr-4 | 27.93 | 6.45 | 23.10 | 8.21 | 34.31 |
| BiOBr        | 32.92 | N/A  | 30.38 | N/A  | 36.70 |

**Table S4** Reports on PHER performance over bismuth oxyhalide catalysts under visible light

| Catalyst                                                                                | Sacrificial agent                                      | Light source | AQE/AQY (%)       | PHER rate (mmol·g <sup>-1</sup> ·h <sup>-1</sup> ) | Refs.     |
|-----------------------------------------------------------------------------------------|--------------------------------------------------------|--------------|-------------------|----------------------------------------------------|-----------|
| BiOBr/W <sub>18</sub> O <sub>49</sub> /PAN                                              | 1 wt% H <sub>2</sub> PtCl <sub>6</sub>                 | 300 W Xe     | N/A               | 0.95 × 10 <sup>-3</sup>                            | [3]       |
| BiOBr/Bi <sub>24</sub> O <sub>31</sub> Br <sub>10</sub> /Ti <sub>3</sub> C <sub>2</sub> | triethanolamine                                        | 500 W Me     | N/A               | 1.25 × 10 <sup>-2</sup>                            | [4]       |
| CQDs/Bi <sub>2</sub> WO <sub>6</sub> /BiOBr                                             | triethanolamine                                        | 350 W Xe     | AQY 1.05 (350 nm) | 0.46                                               | [5]       |
| BiOBr/ZnIn <sub>2</sub> S <sub>4</sub>                                                  | 10 vol% TEOA                                           | 300 W Xe     | AQE 1.6 (420 nm)  | 0.69                                               | [6]       |
| O/D-Bi <sub>5</sub> O <sub>7</sub> Br                                                   | 40 vol% CH <sub>3</sub> OH                             | 300 W Xe     | N/A               | 0.38 × 10 <sup>-2</sup>                            | [7]       |
| I-BiOBr/g-C <sub>3</sub> N <sub>4</sub>                                                 | TEOA                                                   | 300 W Xe     | N/A               | 0.31                                               | [8]       |
| α-Fe <sub>2</sub> O <sub>3</sub> /BiOBr/g-C <sub>3</sub> N <sub>4</sub>                 | CIP/LVX                                                | 300 W Xe     | N/A               | 2.57                                               | [9]       |
| Bi <sub>3</sub> O <sub>4</sub> Br                                                       | 10 vol% methanol                                       | 300 W Xe     | N/A               | 0.38                                               | [10]      |
| Bi <sub>4</sub> O <sub>5</sub> Br <sub>2</sub>                                          | 40 vol% methanol                                       | 300 W Xe     | AQE 0.93 (420 nm) | 0.17                                               | [11]      |
| Bi <sub>24</sub> O <sub>31</sub> Br <sub>10</sub>                                       | 10 vol% methanol                                       | 300 W Xe     | N/A               | 0.06                                               | [12]      |
| AgI-BiOI                                                                                | Na <sub>2</sub> S/NaCl/Na <sub>2</sub> SO <sub>3</sub> | 300 W Xe     | N/A               | 0.168                                              | [13]      |
| BiOCl/WO <sub>3</sub>                                                                   | TEOA                                                   | 300 W Xe     | N/A               | 0.084                                              | [14]      |
| K-BiOI                                                                                  | Methanol                                               | 300 W Xe     | N/A               | 6.51                                               | [15]      |
| BiOCl/TiO <sub>2</sub>                                                                  | TEOA                                                   | 300 W Xe     | N/A               | 1.35                                               | [16]      |
| BiOI@BiOI                                                                               | Methanol                                               | 300 W Xe     | N/A               | 0.048                                              | [17]      |
| CdS-BiOCl/PAN                                                                           | Lactic acid                                            | 300 W Xe     | N/A               | 0.288                                              | [18]      |
| Mo/S-BiOBr                                                                              | Na <sub>2</sub> S/Na <sub>2</sub> SO <sub>3</sub>      | 300 W Xe     | AQE 13.9 (420 nm) | 9.46                                               | This work |

**Table S5** The photocatalytic hydrogen evolution in terms of the Mo<sup>4+</sup>/(Mo<sup>4+</sup>+Mo<sup>6+</sup>) (%) and Vo (%)

values for BiOBr, Mo/BiOBr, S/BiOBr, and Mo/S-BiOBr catalysts

|              | H <sub>2</sub> (mmol·g <sup>-1</sup> ·h <sup>-1</sup> ) | Mo <sup>4+</sup> /(Mo <sup>4+</sup> +Mo <sup>6+</sup> ) (%) | Vo (%) |
|--------------|---------------------------------------------------------|-------------------------------------------------------------|--------|
| BiOBr        | 0                                                       | 0                                                           | 0      |
| Mo/BiOBr     | 0                                                       | 0                                                           | 0      |
| S/BiOBr      | 0                                                       | 0                                                           | 0      |
| Mo/S-BiOBr-1 | 7.43                                                    | 29.73                                                       | 7.11   |
| Mo/S-BiOBr-2 | 11.16                                                   | 32.64                                                       | 12.75  |
| Mo/S-BiOBr-3 | 14.21                                                   | 37.40                                                       | 18.50  |
| Mo/S-BiOBr-4 | 9.18                                                    | 41.58                                                       | 9.96   |

## Reference:

- [1] C. Imparato, G. Iervolino, M. Fantauzzi, C. Koral, W. Macky, M. Kobielski, G. D'Errico, I. Rea, R.D. Girolamo, L.D. Stefano, A. Andreone, V. Vaiano, A. Rossi, A. Aronne, Photocatalytic hydrogen evolution by cocatalyst free TiO<sub>2</sub>/C bulk heterostructures synthesized under mild conditions, *RSC Adv.*, 10 (2020) 12519–12534.
- [2] M.S. Nasir, G. Yang, I. Ayub, S. Wang, W. Yan, Tin diselenide a stable co-catalyst coupled with branched TiO<sub>2</sub> fiber and g-C<sub>3</sub>N<sub>4</sub> quantum dots for photocatalytic hydrogen evolution, *Appl. Catal. B-Environ.*, 270 (2020) 118900.
- [3] Y. Wang, R. Tao, T. Yan, T. Li, X. Fan, Z. Chu, K. Liu, Construction of flexible BiOBr/W<sub>18</sub>O<sub>49</sub>/polyacrylonitrile discrete heterojunction nanofibers as a dual-functional photocatalyst for simultaneous hydrogen evolution and organic pollutant degradation, *Colloids Surf. A: Physicochem. Eng. Aspects*, 694 (2024) 134054.
- [4] L. Zhang, J. Song, X. Meng, W. Liu, Bismuth-rich BiOBr/Bi<sub>2</sub>O<sub>3</sub>Br<sub>10</sub>/Ti<sub>3</sub>C<sub>2</sub> polyheterojunction for visible photocatalytic degradation of dyes and Cr(VI) reduction and hydrogen production applications, *J. Alloys Compd.*, 997 (2024) 174873.
- [5] Y. Zhang, Y. Li, Y. Yuan, S-scheme BiOBr/Bi<sub>2</sub>WO<sub>6</sub> with oxygen vacancies for synergistic photodegradation and hydrogen generation: Mechanisms insight and DFT calculations, *J. Alloys Compd.*, 995 (2024) 174755.
- [6] X. Kuang, X. Jin, F. Chen, A. Pan, H. Duan, Z. Wu, B. Cao, Construction of the V<sub>0</sub>BiOBr/V<sub>s</sub>ZnIn<sub>2</sub>S<sub>4</sub> heterojunction for photocatalytic hydrogen production and dye removal under simulated sunlight, *Int. J. Hydrogen Energy*, 74 (2024) 361–371.
- [7] F. Xie, L. Zhang, X. Zhang, M. Zhang, X. Jian, J. Liu, X. Zhang, Y. Wang, R. Li, C. Fan,

Enhancement of visible light photocatalytic pharmaceutical degradation and hydrogen evolution of Bi<sub>5</sub>O<sub>7</sub>Br by in situ disorder engineering, *T. Nonferr. Metal. Soc.*, 33 (2023) 1862–1872.

- [8] W. Li, X. Ruan, Z. Wei, S. Lian, X. Cui, J. Wang, Tuned band structure and \*H reduction pathway of photocatalytic performance towards I-BiOBr/g-C<sub>3</sub>N<sub>4</sub> heterostructure, *Energy Technol.*, 11 (2023) 2201100.
- [9] Z. Wang, M. Dou, X. Liu, S. Kang, L. Kong, H. Yang, Y. Zhang, Y. Chen, H. Zhu, J. Dou, Ternary Z-scheme  $\alpha$ -Fe<sub>2</sub>O<sub>3</sub>/BiOBr/g-C<sub>3</sub>N<sub>4</sub> photocatalyst for highly efficient hydrogen production coupled with diverse antibiotic degradation, *J. Environ. Chem. Eng.*, 12 (2024) 113080.
- [10] J. Di, J. Xia, M.F. Chisholm, J. Zhong, C. Chen, X. Cao, F. Dong, Z. Chi, H. Chen, Y. Weng, J. Xiong, S. Yang, H. Li, Z. Liu, S. Dai, Defect-tailoring mediated electron-hole separation in single-unit-cell Bi<sub>3</sub>O<sub>4</sub>Br nanosheets for boosting photocatalytic hydrogen evolution and nitrogen fixation, *Adv. Mater.*, 31 (2019) 1807576.
- [11] Y. Bai, T. Chen, P. Wang, L. Wang, L. Ye, Bismuth-rich Bi<sub>4</sub>O<sub>5</sub>X<sub>2</sub> (X = Br, and I) nanosheets with dominant {101} facets exposure for photocatalytic H<sub>2</sub> evolution, *Chem. Eng. J.*, 304 (2016) 454–460.
- [12] J. Shang, W. Hao, X. Lv, T. Wang, X. Wang, Y. Du, S. Dou, T. Xie, D. Wang, J. Wang, Bismuth oxybromide with reasonable photocatalytic reduction activity under visible light, *ACS Catal.*, 4 (2014) 954–961.
- [13] C.-J. Chang, Y.-G. Lin, P.-Y. Chao, J.-K. Chen, AgI-BiOI-graphene composite photocatalysts with enhanced interfacial charge transfer and photocatalytic H<sub>2</sub> production activity, *Appl. Surf. Sci.*, 469 (2019) 703–712.
- [14] D. Sun, M. Zhang, L. Huang, Y. Qu, Y. Yu, B. Lou, H. Du, B. Xu, K. Wang, Intermediate products driven one-pot in-situ synthesis of BiOCl/WO<sub>3</sub> heterojunction with enhanced photocatalytic

hydrogen and oxygen evolution for potential industrial applications, *J. Alloys Compd.*, 969 (2023) 172433.

- [15] J. Yang, H. Su, Y. Wu, D. Li, D. Zhang, H. Sun, S. Yin, Facile synthesis of kermesinus BiOI with oxygen vacancy for efficient hydrogen generation, *Chem. Eng. J.*, 420 (2021) 127607.
- [16] R. Hou, M. Xu, Z. Fan, R. Zhong, Y. Xie, Y. Ling, Y. Wang, BiOCl modified TiO<sub>2</sub> based catalyst with enhanced hydrogen generation properties under visible light via promote photogenerated electron-hole separation. *Mater. Today Phys.*, 44 (2024) 101426.
- [17] H. Huang, K. Xiao, X. Du, Y. Zhang, Vertically aligned nanosheets-array-like BiOI homojunction: Three-in-one promoting photocatalytic oxidation and reduction abilities, *ACS Sustain. Chem. Eng.*, 5 (2017) 5253–5264.
- [18] Q. Zhang, G. Li, J. Bai, R. He, C. Li, Enhanced photocatalytic activities of CdS-BiOCl/PAN composites towards photocatalytic hydrogen evolution, *Mater. Res. Bull.*, 117 (2019) 9–17.
